# Supplementary material
Source: publisher site journal article supplement (https://www.dovepress.com/article/307884)
Supplement: Supplementary file 1 [file get_supplementary_file.php]

## Supplementary Figure 1

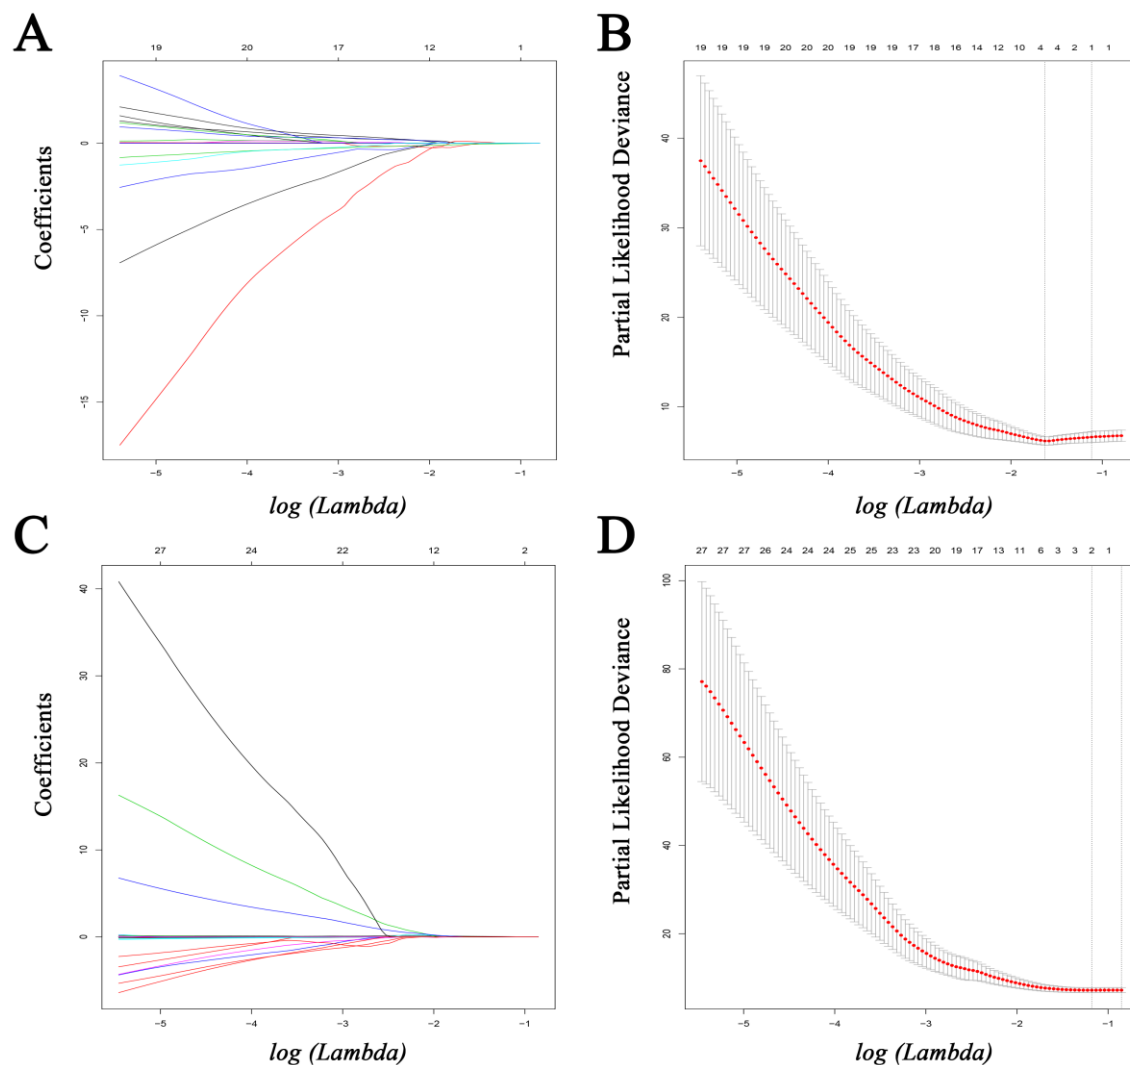

**Supplementary Figure 1** Feature selection using the least absolute shrinkage and selection operator (LASSO) Cox regression model. A. LASSO coefficient profiles of variables against the  $\log(\text{Lambda})$  sequence for OS. B. The tuning parameter ( $\text{Lambda}$ ) selection in the LASSO model used 10-fold cross-validation via minimum criteria for OS. C. LASSO coefficient profiles of 48 variables against the  $\log(\text{Lambda})$  sequence for OS. D. The tuning parameter ( $\text{Lambda}$ ) selection in the LASSO model used 10-fold cross-validation via minimum criteria for OS. OS, overall survival; PFS, progression-free survival.
